# Supplementary material for: Graphene oxide-assisted synthesis of core–shell structured ZSM-5 zeolites and their catalyst texture effect on the catalytic performance in the acid-catalyzedo-methylation of cyclohexanone with methanol
Source: Royal Society of Chemistry journal article supplement (doi:10.1039/c8ce00542g), 2018-01-01
Supplement: c8ce00542g1.pdf [file c8ce00542g1.pdf]

# Core-shell structured ZSM-5 zeolites: GO-assisted synthesis and catalyst texture effect on the catalytic performance in the acid-catalyzed o-methylation of cyclohexanone with methanol

*Xiao-Hui Kang, Ya-Nan Liu, Hai-Tao Wang, Shao-Wei Bian\**

College of Chemistry, Chemical Engineering and Biotechnology, Donghua University, Shanghai 201620, PR China.

E-mail: swbian@dhu.edu.cn; Tel: +86-21-67792049

FT-IR spectra of GO and RGO as shown in Figure S1. The decrease in peak intensity indicates that most oxygen-containing functional groups on GO sheets were removed after a  $\text{NaBH}_4$  chemical reduction process,

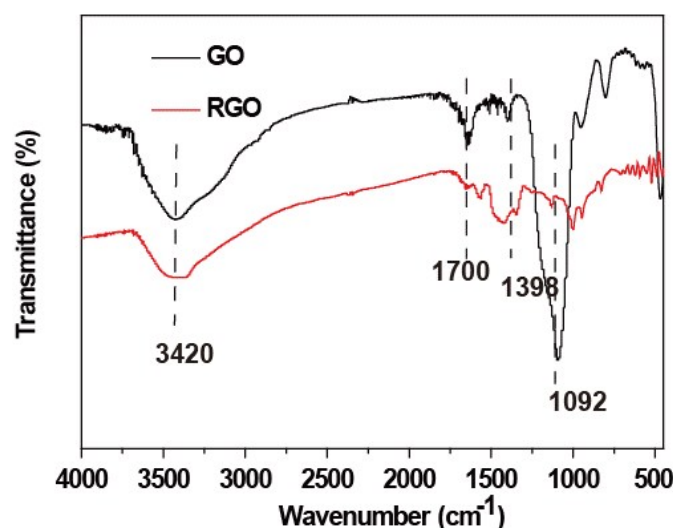

**Figure S1.** FT-IR spectra of GO and RGO sheets.

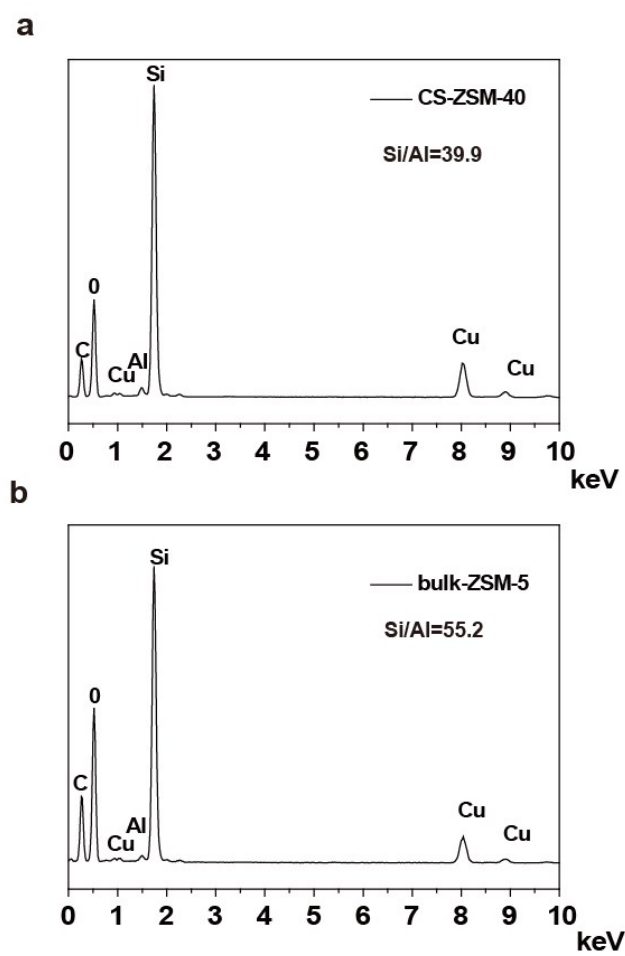

**Figure S2.** EDS patterns of (a) CS-ZSM-5-40 and (b) bulk-ZSM-5 zeolites.
